# Supplementary material
Source: PubMed Central journal article supplement (PMC7829041)

Supplementary Figure 1A. Cumulative Incidence of First Onset of Grade  $\geq 3$  TAE in Entire Patient Population (Untreated and R/R), Bendamustine + Rituximab (BR) vs no BR

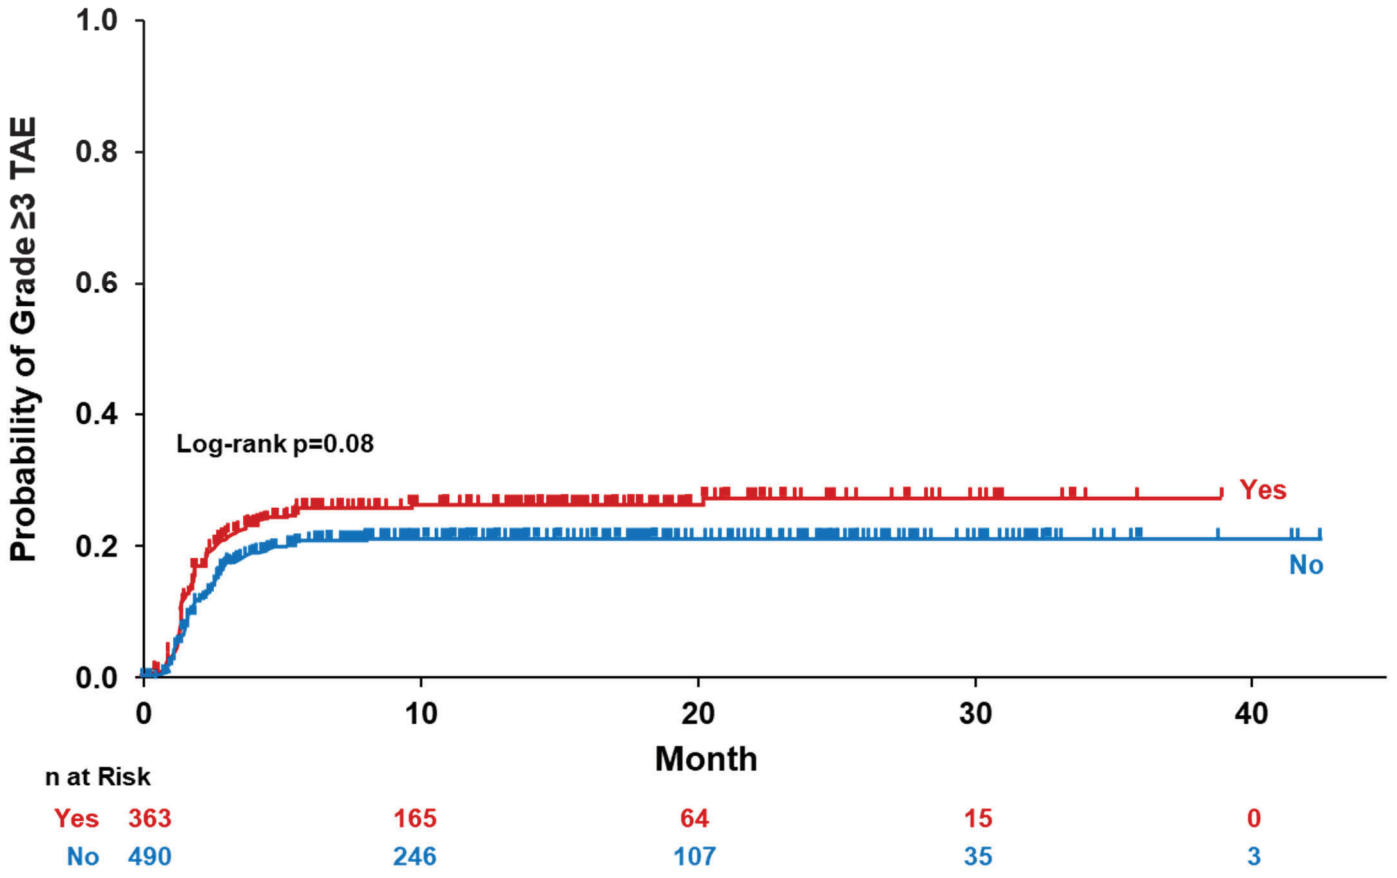

Supplement: NIHMS1661088-supplement-Supplementary_Figure_1A.pdf [file NIHMS1661088-supplement-Supplementary_Figure_1A.pdf]
