# Supplementary material
Source: PubMed Central journal article supplement (PMC7829041)
Supplement: NIHMS1661088-supplement-Supplementary_Figure_1B.pdf [file NIHMS1661088-supplement-Supplementary_Figure_1B.pdf]

Supplementary Figure 1B. Cumulative Incidence of First Onset of Grade  $\geq 3$  TAE in R/R Patient Population Only: BR vs. no BR (log rank  $p=0.0005$ )

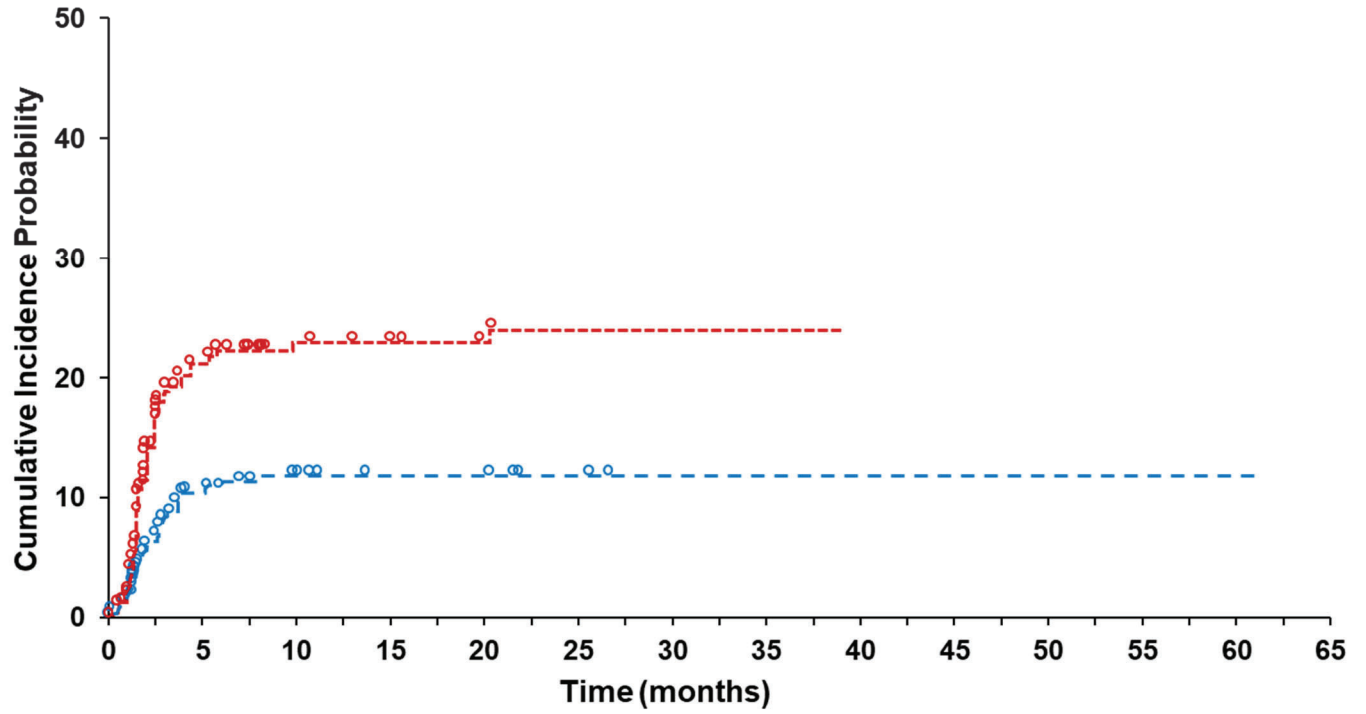

N at Risk (Events)

|       |         |          |          |         |         |         |         |         |         |         |         |        |        |        |
|-------|---------|----------|----------|---------|---------|---------|---------|---------|---------|---------|---------|--------|--------|--------|
| BR    | 207 (0) | 137 (43) | 103 (46) | 88 (46) | 61 (46) | 28 (47) | 17 (47) | 3 (47)  | 1 (47)  | 1 (47)  | 1 (47)  | 1 (47) | 1 (47) | 1 (47) |
| No BR | 283 (0) | 217 (29) | 135 (32) | 92 (32) | 58 (32) | 46 (32) | 29 (32) | 21 (32) | 18 (32) | 15 (32) | 15 (32) | 8 (32) | 2 (32) | 1 (32) |
