# Supplementary material
Source: PubMed Central journal article supplement (PMC7829041)
Supplement: NIHMS1661088-supplement-Supplementary_Figure_1E.pdf [file NIHMS1661088-supplement-Supplementary_Figure_1E.pdf]

Supplementary Figure 1E. Cumulative Incidence of First Onset of Grade  $\geq 3$  TAE in Previously Untreated Patients only, del(17p) yes or no (log-rank  $p=0.02$ )

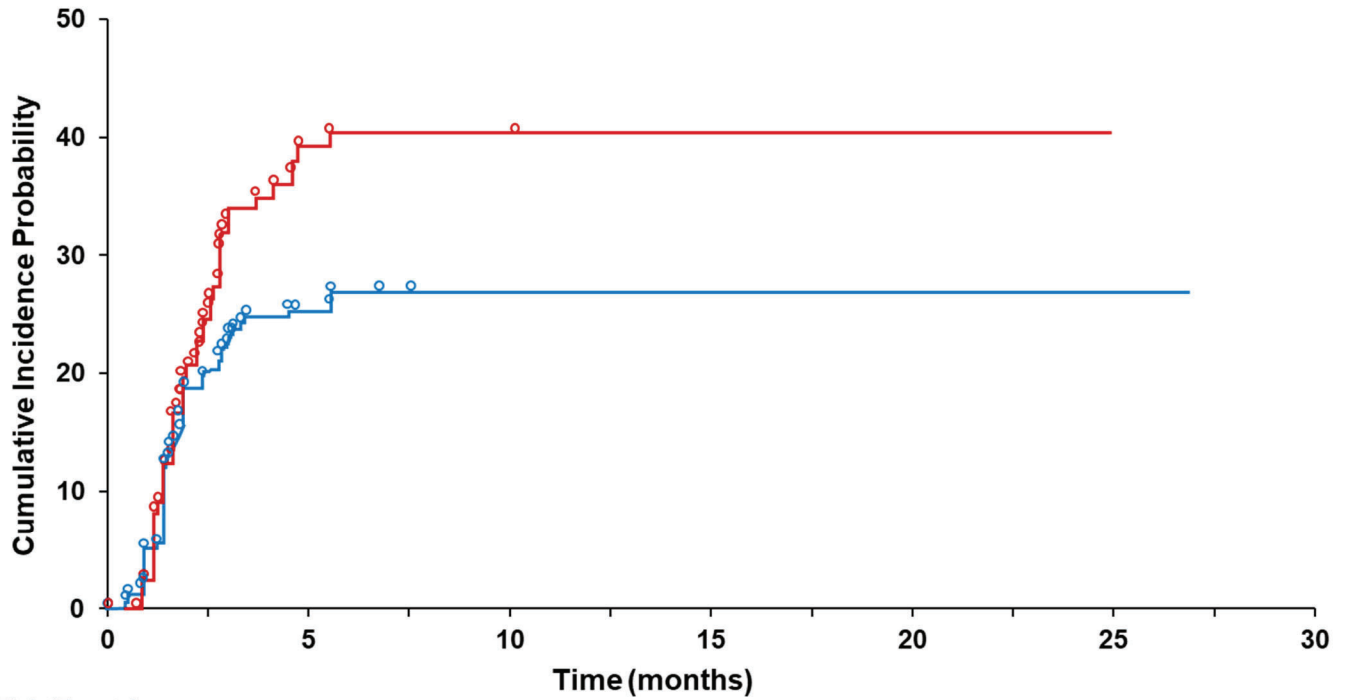

N at Risk (Events)

|     |         |          |          |         |         |        |        |
|-----|---------|----------|----------|---------|---------|--------|--------|
| Yes | 122 (0) | 52 (46)  | 30 (47)  | 8 (47)  | 3 (47)  | 1 (47) | 1 (47) |
| No  | 234 (0) | 138 (57) | 105 (60) | 47 (60) | 14 (60) | 7 (60) | 1 (60) |
