# Supplementary material
Source: PubMed Central journal article supplement (PMC7829041)
Supplement: NIHMS1661088-supplement-Supplementary_Table_1.pdf [file NIHMS1661088-supplement-Supplementary_Table_1.pdf]

**Supplementary Table 1. Summary of Studies and Patient Characteristics**

|                                                                                                 | <b>101-08,<br/>Cohort 1</b>                 | <b>101-08,<br/>Cohort 2</b>                 | <b>312-0123</b>            | <b>312-0133</b>                            | <b>312-0116</b>           | <b>312-0119</b>            | <b>312-0115</b>           | <b>All</b>                 |
|-------------------------------------------------------------------------------------------------|---------------------------------------------|---------------------------------------------|----------------------------|--------------------------------------------|---------------------------|----------------------------|---------------------------|----------------------------|
|                                                                                                 | <b>(NCT01203<br/>930)</b>                   | <b>(NCT01203<br/>930)</b>                   | <b>(NCT01980<br/>888)</b>  | <b>(NCT00204<br/>4822)</b>                 | <b>(NCT01539<br/>512)</b> | <b>(NCT01659<br/>021)</b>  | <b>(NCT015<br/>69295)</b> | <b>N=853</b>               |
| <b>Eligibility<br/>criteria</b>                                                                 | <b>Untreated<br/>CLL<br/>Aged<br/>≥65 y</b> | <b>Untreated<br/>CLL<br/>Aged<br/>≥65 y</b> | <b>Untreated<br/>CLL</b>   | <b>Untreated<br/>CLL with<br/>del(17p)</b> | <b>R/R CLL</b>            | <b>R/R CLL</b>             | <b>R/R<br/>CLL</b>        |                            |
| <b>Treatment</b>                                                                                | <b>IDELA +<br/>R</b>                        | <b>IDELA</b>                                | <b>IDELA +<br/>BR</b>      | <b>IDELA +<br/>R</b>                       | <b>IDELA +<br/>R</b>      | <b>IDELA +<br/>O</b>       | <b>IDELA +<br/>BR</b>     |                            |
| <b>Patients on<br/>IDELA, n</b>                                                                 | <b>64</b>                                   | <b>41</b>                                   | <b>156</b>                 | <b>102</b>                                 | <b>110</b>                | <b>173</b>                 | <b>207</b>                |                            |
| <b>Median<br/>IDELA<br/>exposure<br/>(range) –<br/>mos.</b>                                     | <b>10.8</b><br>(0.8, 12.3)                  | <b>9.3</b><br>(1.4, 26.8)                   | <b>12.1</b><br>(0.2, 22.1) | <b>6.4</b><br>(0.7, 17.0)                  | <b>8.1</b><br>(0.3, 19.5) | <b>13.9</b><br>(0.2, 36.5) | <b>18.2</b><br>(0, 43.4)  | <b>11</b><br>(<1, 43)      |
| <b>Median age<br/>(range), y</b>                                                                | <b>71</b><br>(65, 90)                       | <b>71</b><br>(65, 84)                       | <b>65</b><br>(37, 83)      | <b>66</b><br>(37, 86)                      | <b>71</b><br>(48, 90)     | <b>68</b><br>(40, 85)      | <b>62</b><br>(38, 83)     | <b>67</b><br>(37, 90)      |
| <b>Number of<br/>prior<br/>regimens<br/>(range)</b>                                             | <b>N/A</b>                                  | <b>N/A</b>                                  | <b>N/A</b>                 | <b>N/A</b>                                 | <b>3.0</b><br>(1, 12)     | <b>3.0</b><br>(1, 11)      | <b>2.0</b><br>(1, 13)     | <b>R/R</b><br><b>n=490</b> |
| <b>Unmutated,<br/>%</b>                                                                         | <b>58</b>                                   | <b>46</b>                                   | <b>65</b>                  | <b>87</b>                                  | <b>83</b>                 | <b>79</b>                  | <b>84</b>                 |                            |
| <b>Del (17p),<br/>%</b>                                                                         | <b>9</b>                                    | <b>10</b>                                   | <b>6</b>                   | <b>100</b>                                 | <b>24</b>                 | <b>27</b>                  | <b>18</b>                 |                            |
| <b>Patients<br/>with Grade<br/>≥3<br/>ALT/AST<br/>elevation,<br/>n (%)</b>                      | <b>15 (23)</b>                              | <b>9 (22)</b>                               | <b>41 (26)</b>             | <b>42 (41)</b>                             | <b>10 (9)</b>             | <b>22 (13)</b>             | <b>47 (23)</b>            |                            |
| <b>PBO-<br/>treated<br/>patients<br/>with Grade<br/>≥3<br/>ALT/AST<br/>elevation,<br/>n (%)</b> | <b>N/A</b>                                  | <b>N/A</b>                                  | <b>2/154</b><br>(1.3)      | <b>N/A</b>                                 | <b>1/108</b><br>(0.9)     | <b>1/86</b><br>(1.2)       | <b>8/209</b><br>(3.8)     | <b>N/A</b>                 |

ALT, alanine transaminase; AST, aspartate transaminase
