# Supplementary material
Source: PubMed Central journal article supplement (PMC7829041)
Supplement: NIHMS1661088-supplement-Supplementary_Table_2.pdf [file NIHMS1661088-supplement-Supplementary_Table_2.pdf]

Supplementary Table 2.

Frequency of Grade ≥3 TAE in Association With Commonly Used Drugs

| Patients, n (%)                      | Patients With Grade ≥3 TAE*<br>n=186 | Patients Without Grade ≥3 TAE+<br>n=667 | All Patients+<br>N=853 |
|--------------------------------------|--------------------------------------|-----------------------------------------|------------------------|
| <b>Acetaminophen</b>                 |                                      |                                         |                        |
| Yes                                  | 131 (70)                             | 653 (98)                                | 784 (92)               |
| No                                   | 55 (30)                              | 14 (2)                                  | 69 (8)                 |
| <b>Allopurinol</b>                   |                                      |                                         |                        |
| Yes                                  | 76 (41)                              | 475 (71)                                | 551 (65)               |
| No                                   | 110 (59)                             | 192 (29)                                | 302 (35)               |
| <b>Trimethoprim/sulfamethoxazole</b> |                                      |                                         |                        |
| Yes                                  | 62 (33)                              | 410 (61)                                | 472 (55)               |
| No                                   | 124 (67)                             | 257 (39)                                | 381 (45)               |
| <b>Acyclovir<sup>++</sup></b>        |                                      |                                         |                        |
| Yes                                  | 41 (22)                              | 315 (47)                                | 356 (42)               |
| No                                   | 145 (78)                             | 352 (53)                                | 497 (58)               |

\* "Yes" indicates that patient received drug within 7 d of 1<sup>st</sup> event of any Grade ALT/AST elevation;

<sup>++</sup>"Yes" indicates that patient received ≥1 drug dose at any time; <sup>++</sup>Valacyclovir not included in analysis
